# Supplementary material for: Recombinant production of medium- to large-sized peptides in Escherichia coli using a cleavable self-aggregating tag
Source: PubMed Central journal article supplement (PMC4975908; doi:10.1186/s12934-016-0534-3), 2016-08-05
Supplement: 12934_2016_534_MOESM1_ESM.pdf [file 12934_2016_534_MOESM1_ESM.pdf]

Additional file 1. Peptide sequences.

---

| <b>Peptide</b>                  | <b>Residue<br/>number (aa)</b> | <b>Sequence</b>                                                                                                                                      |
|---------------------------------|--------------------------------|------------------------------------------------------------------------------------------------------------------------------------------------------|
| <b>GLP-1</b>                    | 31                             | HAEGTFTSDVSSYLEGQAAKEFIAWLVKGRG                                                                                                                      |
| <b>BNP</b>                      | 32                             | SPKMOVQSGCFGRKMDRISSSSLGCKVLRH                                                                                                                       |
| <b>Ex-4</b>                     | 39                             | HGEGTFTSDLKQMEEEAVRLFIEWLKNGGPSSGAPPS                                                                                                                |
| <b>CCL5</b>                     | 66                             | YSSDTPCCFAYIARPLPRAHIKEYFYTSKGKCSNPAVVVTRKNRQVCANPEKKWVREYINSLEMS                                                                                    |
| <b>SDF-1<math>\alpha</math></b> | 67                             | KPVSLSYRCPCRFFESHVARANVKHLKILNTPNCALQIVARLKNNNRQVCIDPKLKWIQEYLEKALN                                                                                  |
| <b>IGF-1</b>                    | 70                             | GPETLCGAELVDALQFVCGDRGFYFNKPTGYGSSRRAPQTGIVDECCFRSCDLRRLEMYCAPLKPAKSA                                                                                |
| <b>leptin</b>                   | 146                            | VPIQKVQDDTKTLIKTIVTRINDISHTQSVSSKQKVTGLDFIPGLHPILTLKMDQTLAVYQQILSMPSRNVIQ<br>ISNDLENLRDLLHVLAFSKKSCHLPWASGLETLDLGGVLEASGYSTEVVALSRLQGSLQDMLWQLDLSPGC |

---
